# Supplementary material
Source: PubMed Central journal article supplement (PMC3890332)
Supplement: supp_cit643_cit643supp.pdf [file supp_cit643_cit643supp.pdf]

## **Appendix 1: Search strategy**

### **PubMed - 1103**

"Mycobacterium tuberculosis"[Mesh] OR "Tuberculosis"[Mesh] OR tuberculosis[tiab] OR tb[tiab]

AND

"Drug Resistance"[Mesh] OR resistan\*[tiab] OR mdr[tiab] OR xdr[tiab] OR dr[tiab]

AND

“contact tracing”[mesh] OR "Disease Outbreaks"[Mesh] OR "Disease Transmission, Infectious"[Mesh] OR household\*[tiab] OR contact\*[tiab] OR outbreak\*

### **Embase - 1686**

'Mycobacterium tuberculosis'/exp OR 'tuberculosis'/exp OR 'tuberculosis':ti,ab OR 'tb':ti,ab

AND

'drug resistance'/exp OR resistan\*':ti,ab OR 'mdr':ti,ab OR 'xdr':ti,ab OR 'dr':ti,ab

AND

'contact examination'/exp OR 'disease transmission'/exp OR household\*':ti,ab OR outbreak\*':ti,ab OR contact\*':ti,ab

### **LILACS – 56, WPRIM – 9, IMEAR – 14**

“tb” or “tuberculosis” [words]

AND

“MDR” or “XDR” or “DR” or “resistant” or “resistance” [words]

AND

“contact” or “contacts” or “outbreak” or “household” or “households” or “transmission” [words]

### **AIM – 25**

“tb” or “tuberculosis” [words]

AND

“MDR” or “XDR” or “DR” or “resistant” or “resistance” [words]
